# Supplementary material for: Ingol and Ingenol-Type Diterpenes from Euphorbia trigona Miller with Keratinocyte Inhibitory Activity
Source: MDPI journal article supplement (doi:10.3390/plants10061206), 2021-06-14
Supplement: s1 [file s1]

## SUPPORTING INFORMATION

Article

# Ingol and Ingenol-type Diterpenes from *Euphorbia trigona* Mill. with Keratinocyte Inhibitory Activity

Reham Hammadi <sup>1</sup>, Norbert Kúsz <sup>1</sup>, Csilla Zsuzsanna Dávid <sup>1</sup>, Zoltán Behány <sup>2</sup>, László Papp <sup>3</sup>, Lajos Kemény <sup>2</sup>, Judit Hohmann <sup>1,4</sup>, Lóránt Lakatos <sup>2,\*</sup> and Andrea Vasas <sup>1,\*</sup>

<sup>1</sup> Department of Pharmacognosy, Interdisciplinary Excellence Centre, University of Szeged, 6720 Szeged, Eötvös u. 6., Hungary; reham.hammadi@pharmacognosy.hu, kusznorbert@gmail.com, davidzsuzsanna88@gmail.com, hohmann.judit@szte.hu, vasas.andrea@szte.hu

<sup>2</sup> Department of Dermatology and Allergology University of Szeged, 6720 Szeged, Korányi fasor 6., Hungary; behany.zoltan@med.u-szeged.hu, kemeny.lajos@med.u-szeged.hu, lakatos.lorant@brc.hu

<sup>3</sup> Botanical Garden, Eötvös Loránd University, 1083 Budapest, Illés u. 25, Hungary; papplaca@gmail.com

<sup>4</sup> Interdisciplinary Centre of Natural Products, University of Szeged, 6720 Szeged, Eötvös u. 6, Hungary; hohmann.judit@szte.hu

\* Correspondence: vasas.andrea@szte.hu; Tel.: +36 62546451 A.V.; lakatos.lorant @ brc.hu, L.L.

## Table of content

|                                                                                                                                                                                                                                                                                                                |    |
|----------------------------------------------------------------------------------------------------------------------------------------------------------------------------------------------------------------------------------------------------------------------------------------------------------------|----|
| <b>Figure S1.</b> $^1\text{H}$ NMR spectrum of compound <b>1</b> (500 MHz, in $\text{CDCl}_3$ ) .....                                                                                                                                                                                                          | 3  |
| <b>Figure S2.</b> $^{13}\text{C}$ JMOD NMR spectrum of compound <b>1</b> (125 MHz, in $\text{CDCl}_3$ ) .....                                                                                                                                                                                                  | 3  |
| <b>Figure S3.</b> $^1\text{H}$ NMR spectrum of compound <b>2</b> (500 MHz, in $\text{CDCl}_3$ ) .....                                                                                                                                                                                                          | 4  |
| <b>Figure S4.</b> $^{13}\text{C}$ JMOD NMR spectrum of compound <b>2</b> (125 MHz, in $\text{CDCl}_3$ ) .....                                                                                                                                                                                                  | 4  |
| <b>Figure S5.</b> $^1\text{H}$ NMR spectrum of compound <b>3</b> (500 MHz, in $\text{CDCl}_3$ ) .....                                                                                                                                                                                                          | 5  |
| <b>Figure S6.</b> $^{13}\text{C}$ JMOD NMR spectrum of compound <b>3</b> (125 MHz, in $\text{CDCl}_3$ ) .....                                                                                                                                                                                                  | 5  |
| <b>Figure S7.</b> $^1\text{H}$ NMR spectrum of the mixture of compounds <b>4</b> and <b>5</b> (500 MHz, in $\text{CDCl}_3$ ) .....                                                                                                                                                                             | 6  |
| <b>Figure S8.</b> $^{13}\text{C}$ JMOD NMR spectrum of the mixture of compounds <b>4</b> and <b>5</b> (125 MHz, in $\text{CDCl}_3$ ) .....                                                                                                                                                                     | 6  |
| <b>Figure S9.</b> $^1\text{H}$ NMR spectrum of compound <b>6</b> (500 MHz, in $\text{CDCl}_3$ ) .....                                                                                                                                                                                                          | 7  |
| <b>Figure S10.</b> $^{13}\text{C}$ JMOD NMR spectrum of compound <b>6</b> (125 MHz, in $\text{CDCl}_3$ ) .....                                                                                                                                                                                                 | 7  |
| <b>Figure S11.</b> $^1\text{H}$ NMR spectrum of compound <b>7</b> (500 MHz, in $\text{CDCl}_3$ ) .....                                                                                                                                                                                                         | 8  |
| <b>Figure S12.</b> $^{13}\text{C}$ JMOD NMR spectrum of compound <b>7</b> (125 MHz, in $\text{CDCl}_3$ ) .....                                                                                                                                                                                                 | 8  |
| <b>Figure S13.</b> $^1\text{H}$ NMR spectrum of compound <b>8</b> (500 MHz, in $\text{CDCl}_3$ ) .....                                                                                                                                                                                                         | 9  |
| <b>Figure S14.</b> $^{13}\text{C}$ JMOD NMR spectrum of compound <b>8</b> (125 MHz, in $\text{CDCl}_3$ ) .....                                                                                                                                                                                                 | 9  |
| <b>Figure S15.</b> $^1\text{H}$ NMR spectrum of compound <b>9</b> (500 MHz, in $\text{CDCl}_3$ ) .....                                                                                                                                                                                                         | 10 |
| <b>Figure S16.</b> $^{13}\text{C}$ JMOD NMR spectrum of compound <b>9</b> (125 MHz, in $\text{CDCl}_3$ ) .....                                                                                                                                                                                                 | 10 |
| <b>Figure S17.</b> RTCA (real-time cell analysis) measurement of CI (cell index) values of HPV-Ker cells treated with compounds <b>1</b> , <b>2</b> , <b>4+5</b> , <b>6</b> and <b>9</b> . Normalized CI * hours values were plotted as a function of concentration of the indicated diterpenoid (logM). ..... | 11 |

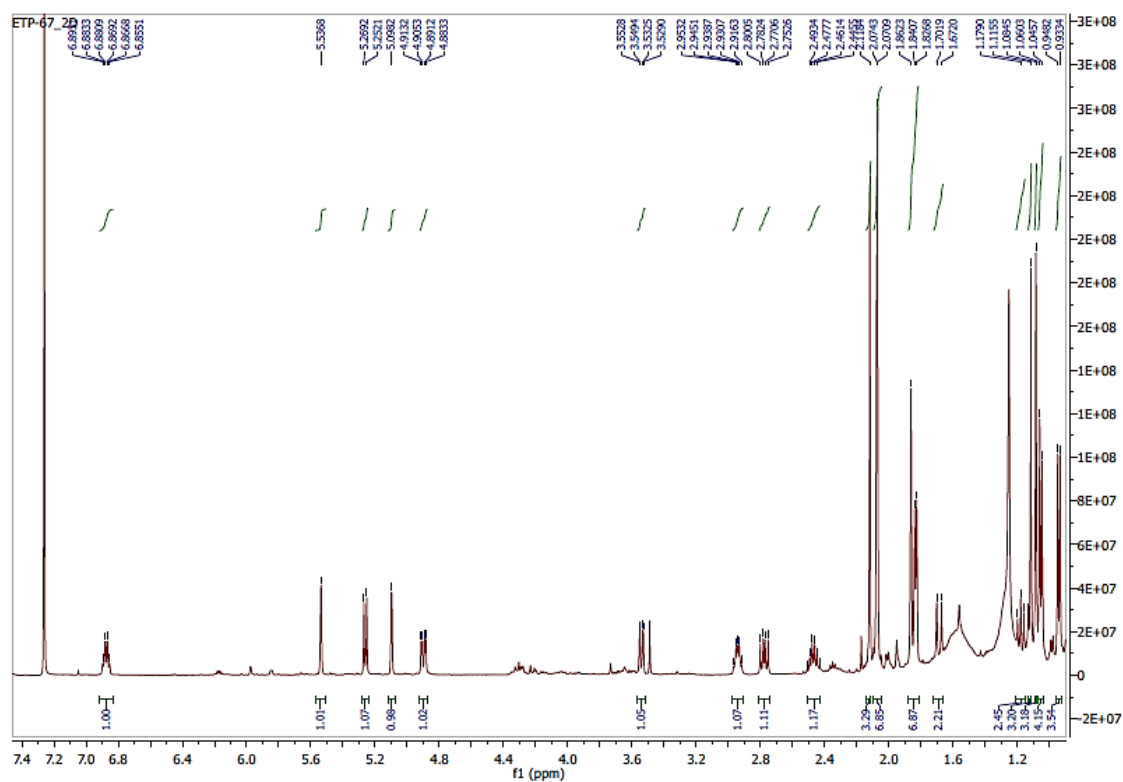

**Figure S1.**  $^1\text{H}$  NMR spectrum of compound **1** (500 MHz, in  $\text{CDCl}_3$ )

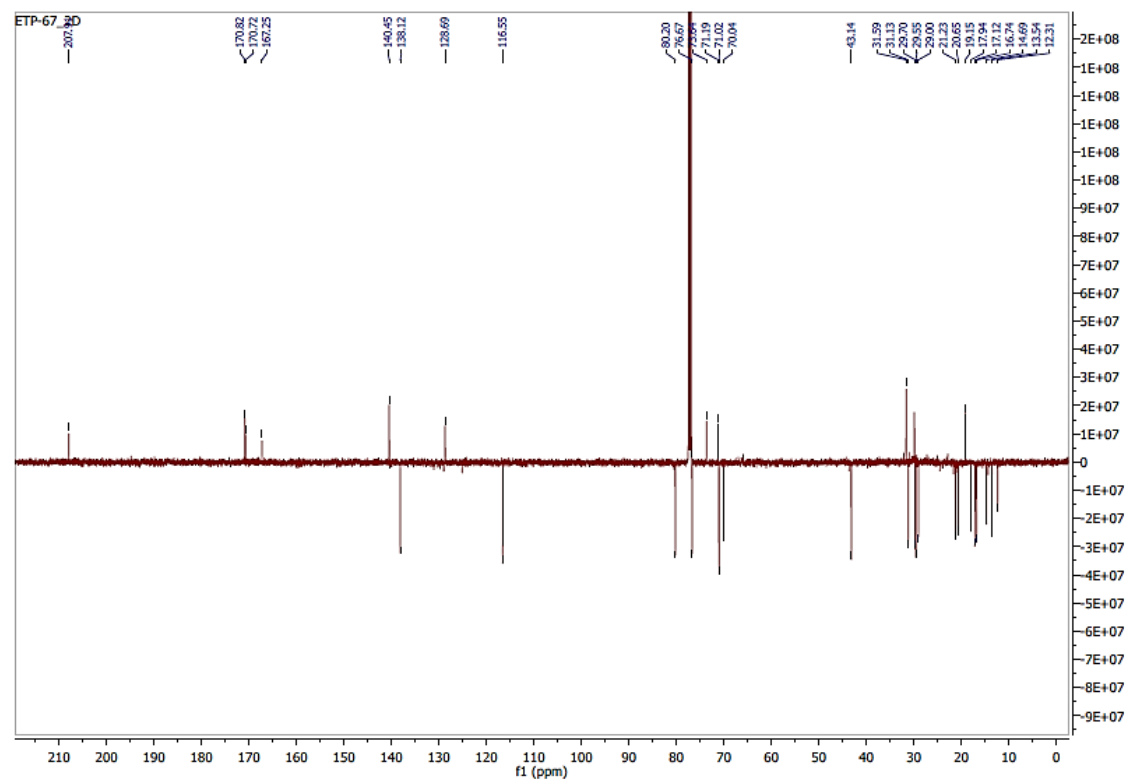

**Figure S2.**  $^{13}\text{C}$  JMOD NMR spectrum of compound **1** (125 MHz, in  $\text{CDCl}_3$ )

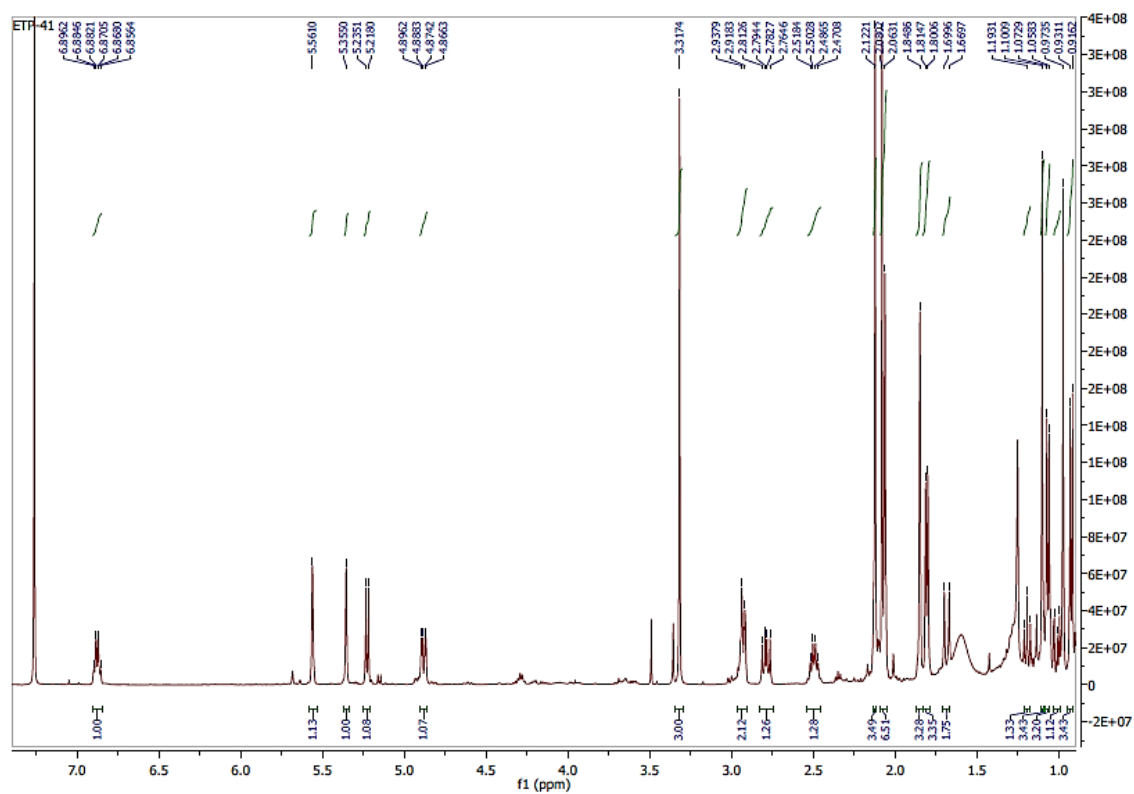

Figure S3.  $^1\text{H}$  NMR spectrum of compound 2 (500 MHz, in  $\text{CDCl}_3$ )

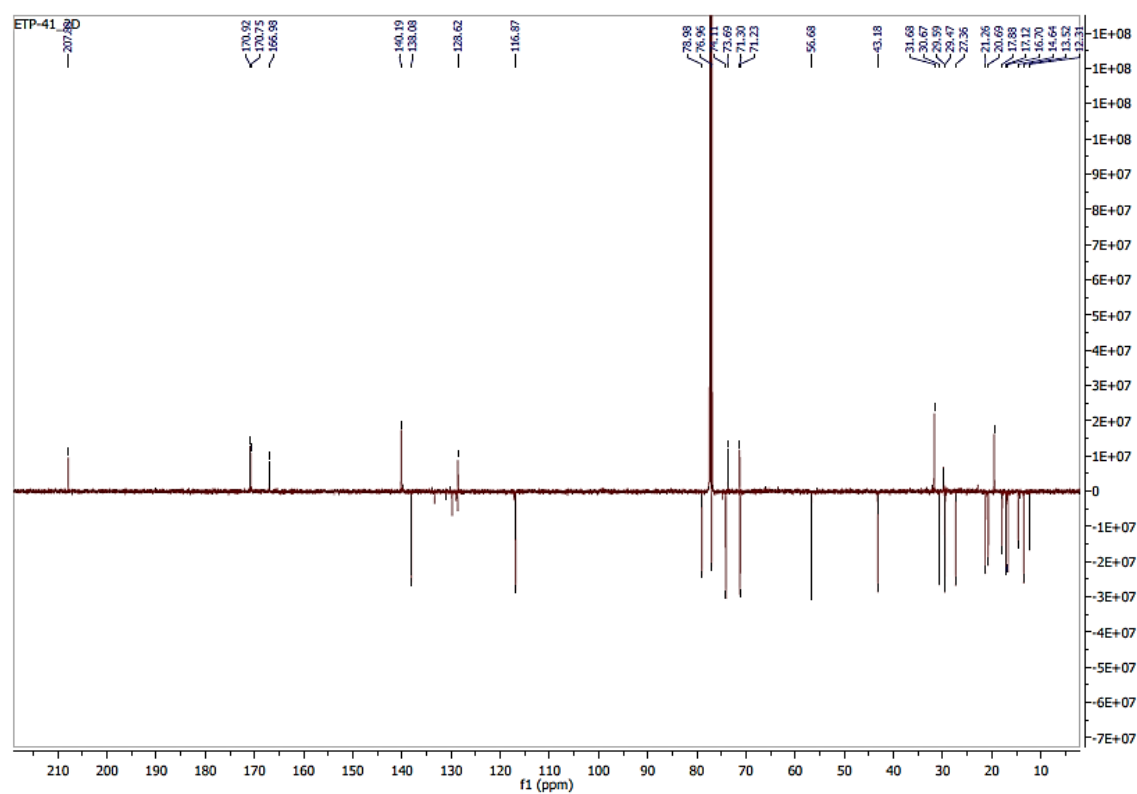

Figure S4.  $^{13}\text{C}$  JMOD NMR spectrum of compound 2 (125 MHz, in  $\text{CDCl}_3$ )

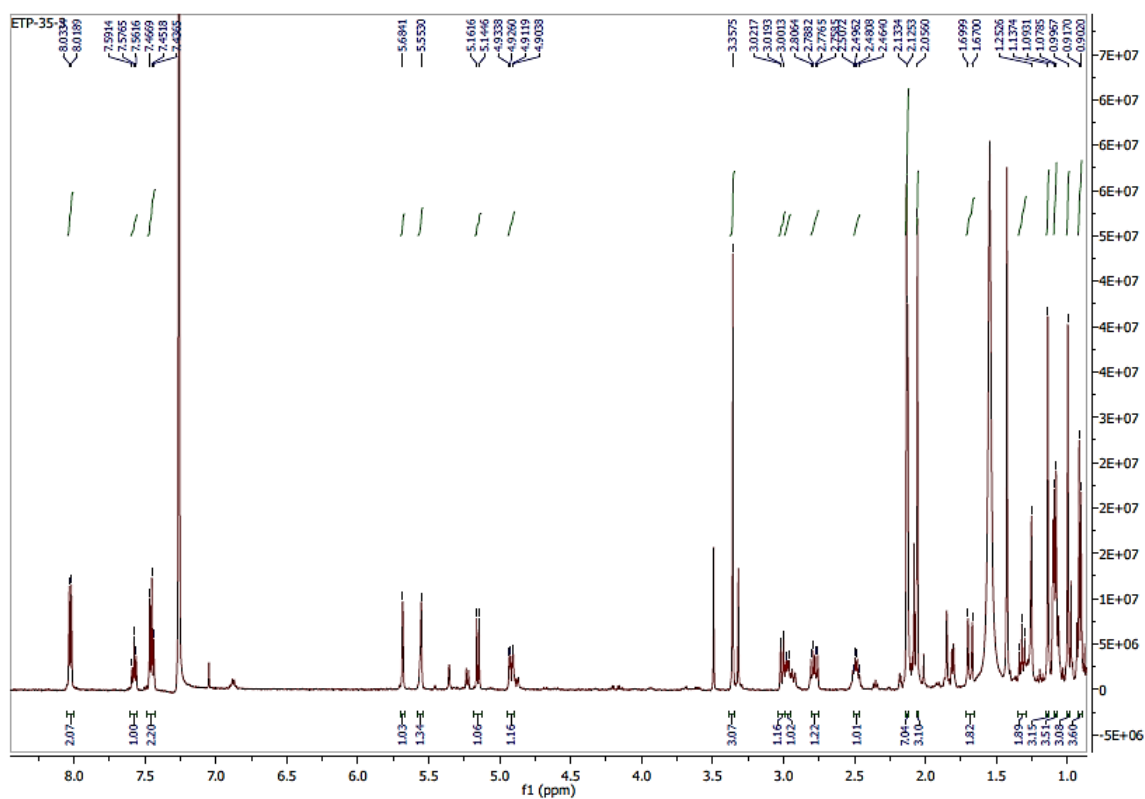

**Figure S5.**  $^1\text{H}$  NMR spectrum of compound **3** (500 MHz, in  $\text{CDCl}_3$ )

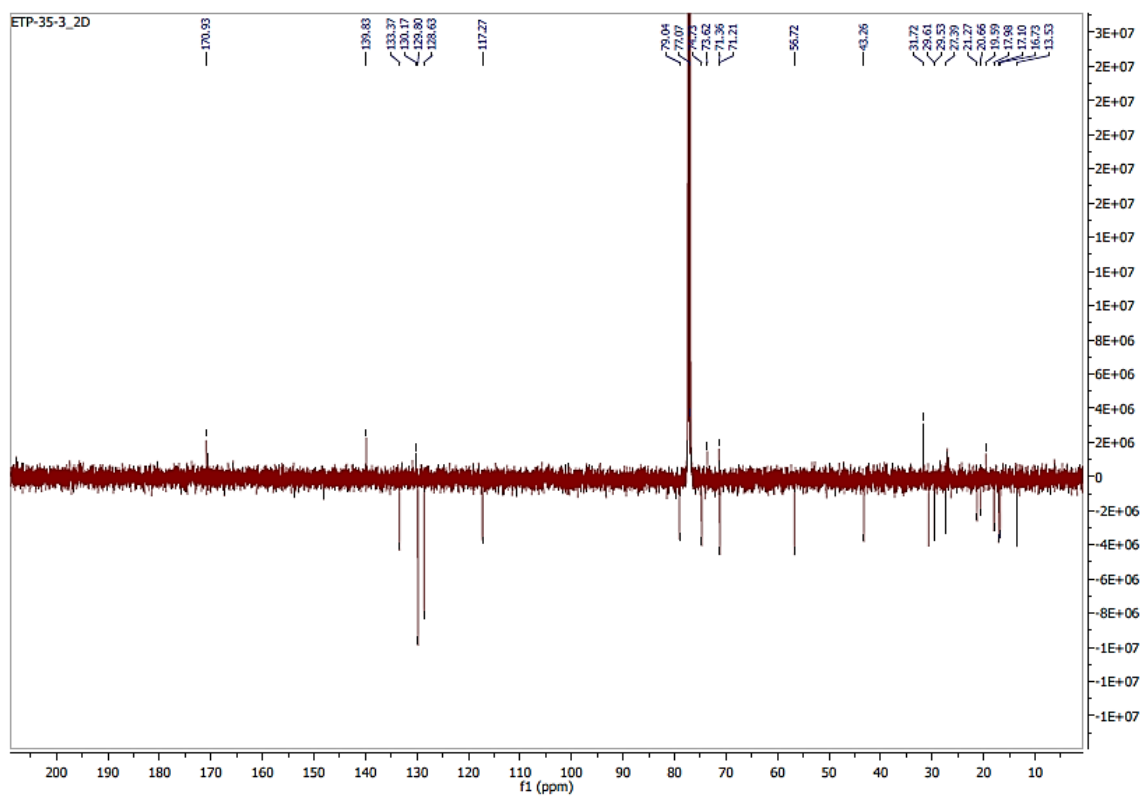

**Figure S6.**  $^{13}\text{C}$  JMOD NMR spectrum of compound **3** (125 MHz, in  $\text{CDCl}_3$ )



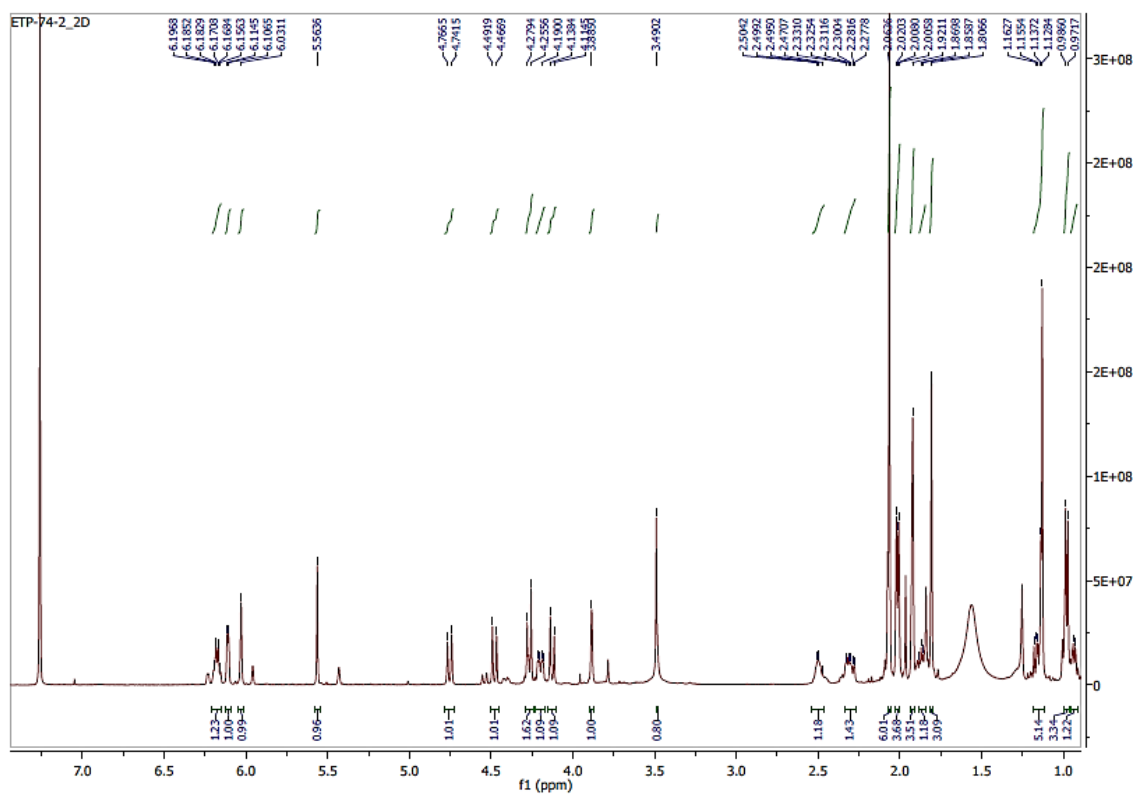

Figure S9.  $^1\text{H}$  NMR spectrum of compound **6** (500 MHz, in  $\text{CDCl}_3$ )

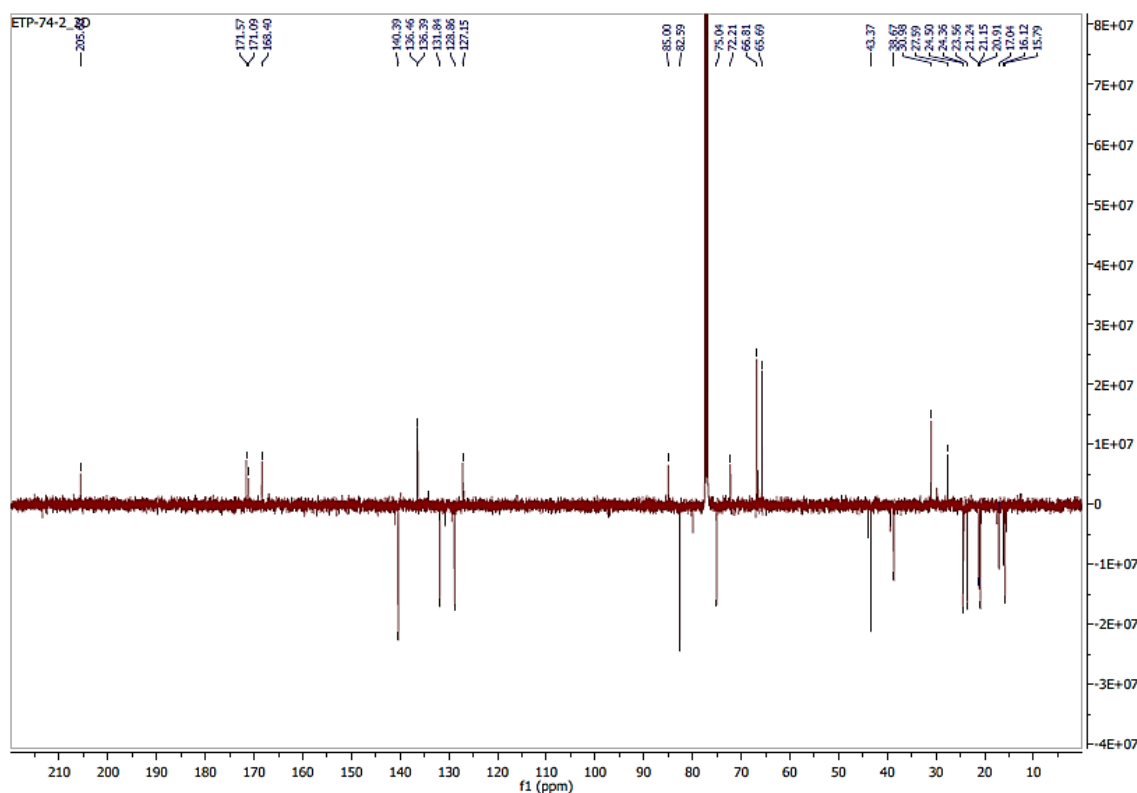

Figure S10.  $^{13}\text{C}$  JMOD NMR spectrum of compound **6** (125 MHz, in  $\text{CDCl}_3$ )

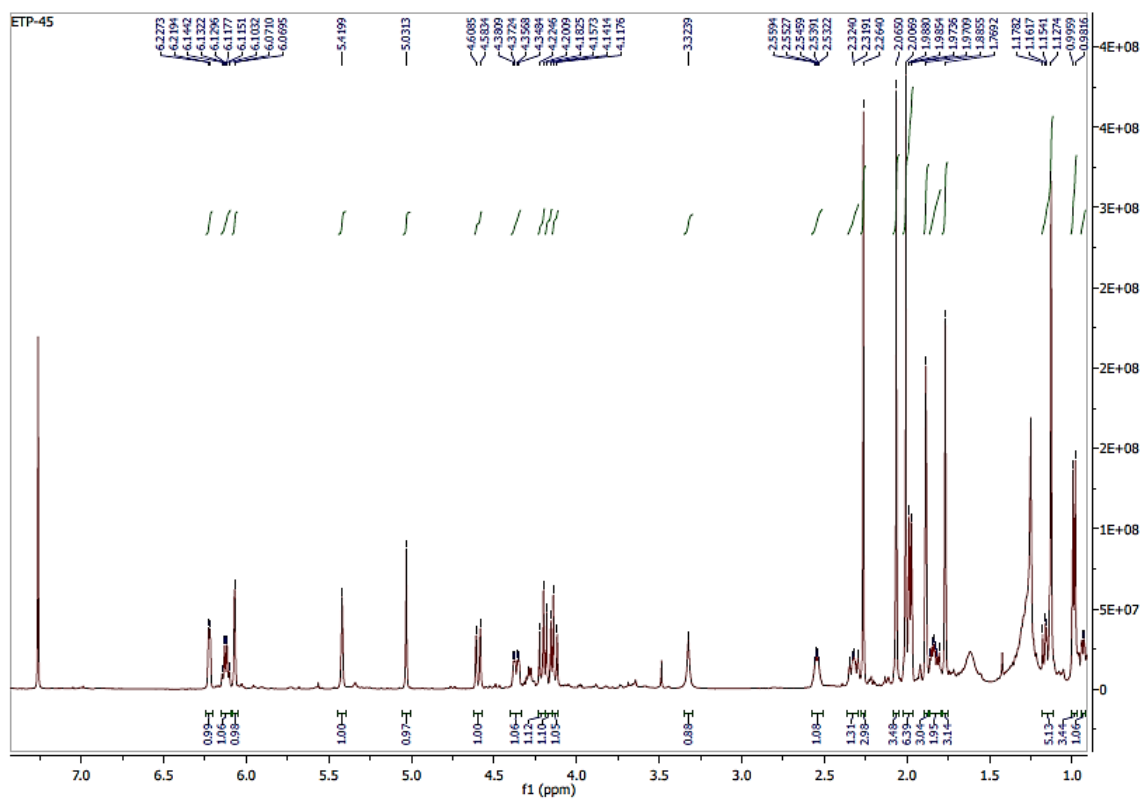

**Figure S11.**  $^1\text{H}$  NMR spectrum of compound **7** (500 MHz, in  $\text{CDCl}_3$ )

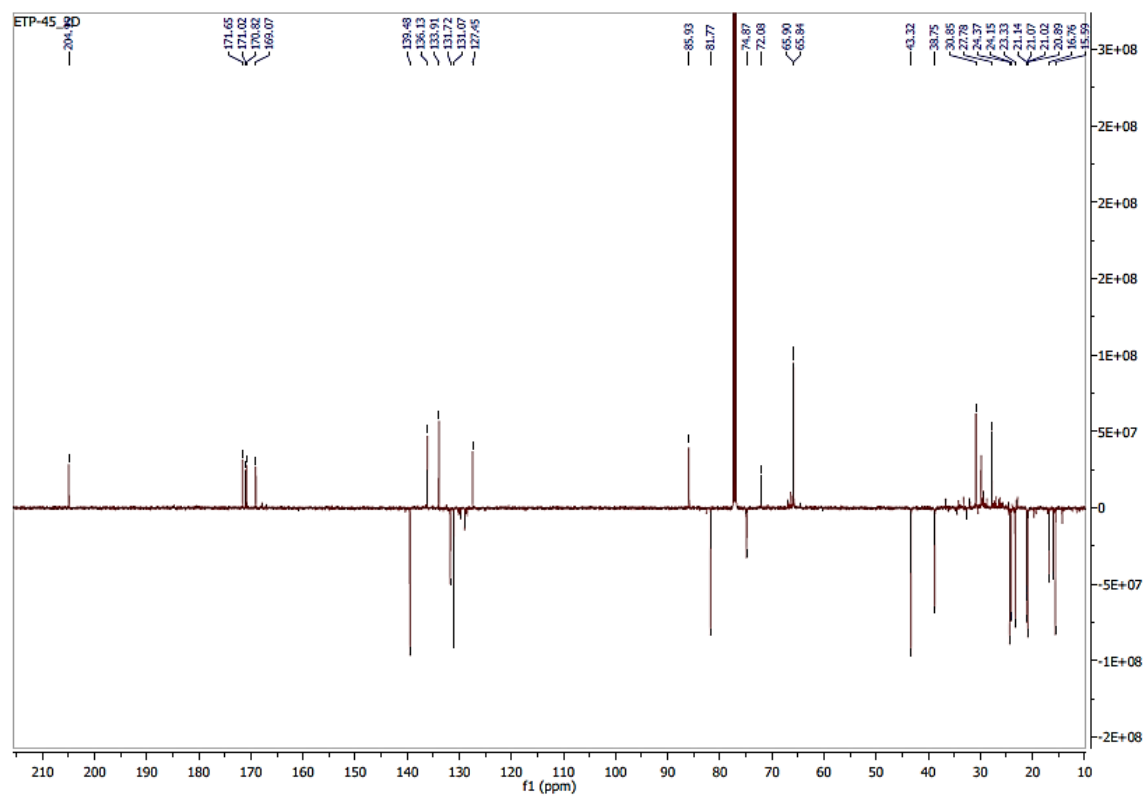

**Figure S12.**  $^{13}\text{C}$  JMOD NMR spectrum of compound **7** (125 MHz, in  $\text{CDCl}_3$ )



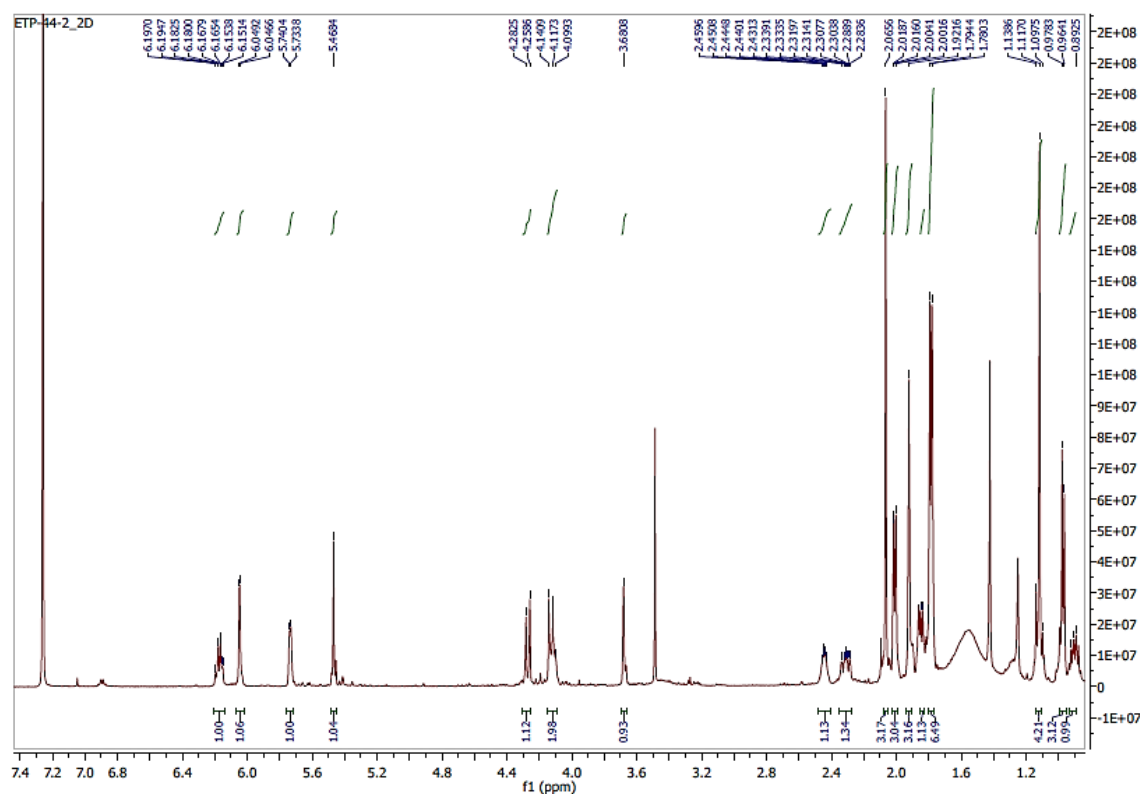

Figure S13.  $^1\text{H}$  NMR spectrum of compound 8 (500 MHz, in  $\text{CDCl}_3$ )

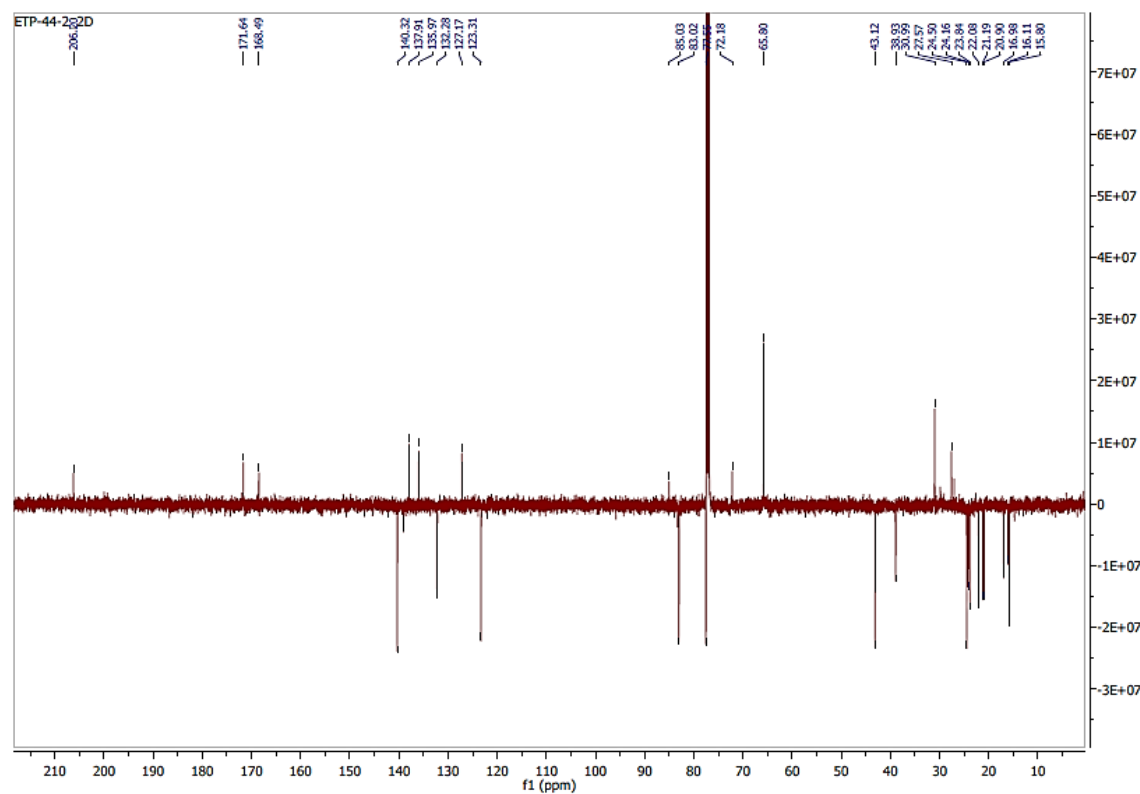

Figure S14.  $^{13}\text{C}$  JMOD NMR spectrum of compound 8 (125 MHz, in  $\text{CDCl}_3$ )

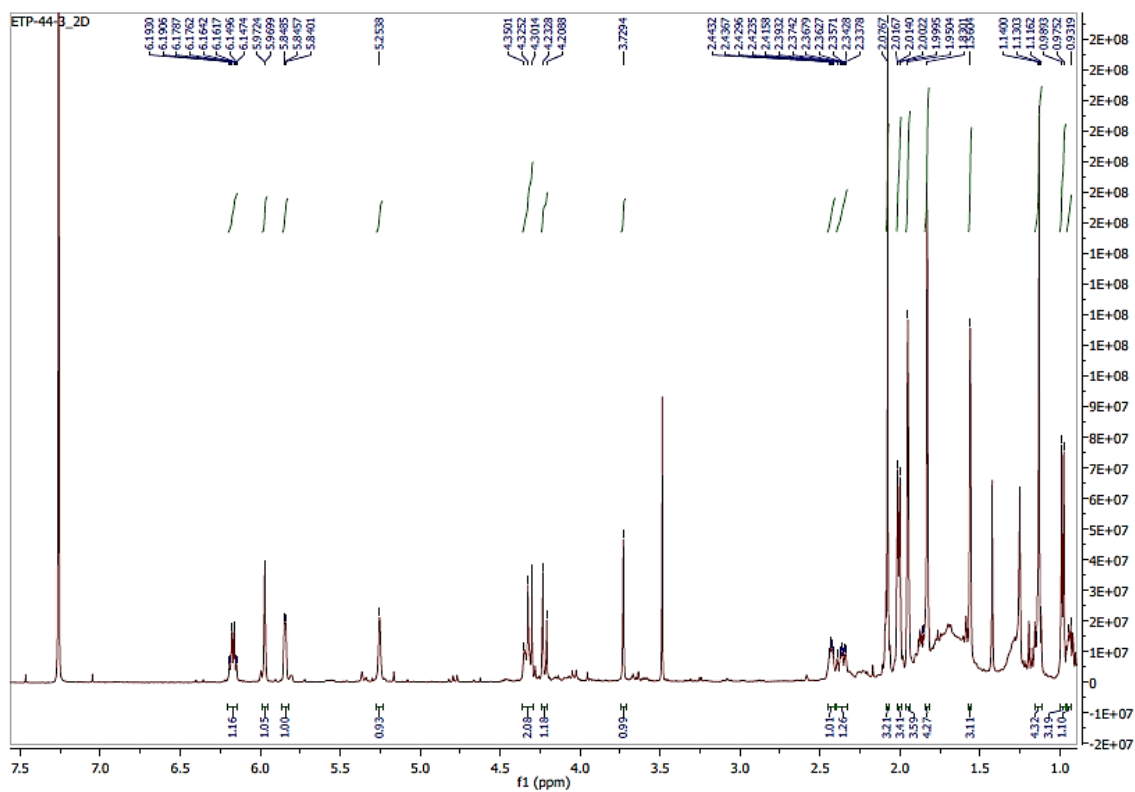

Figure S15.  $^1\text{H}$  NMR spectrum of compound **9** (500 MHz, in  $\text{CDCl}_3$ )

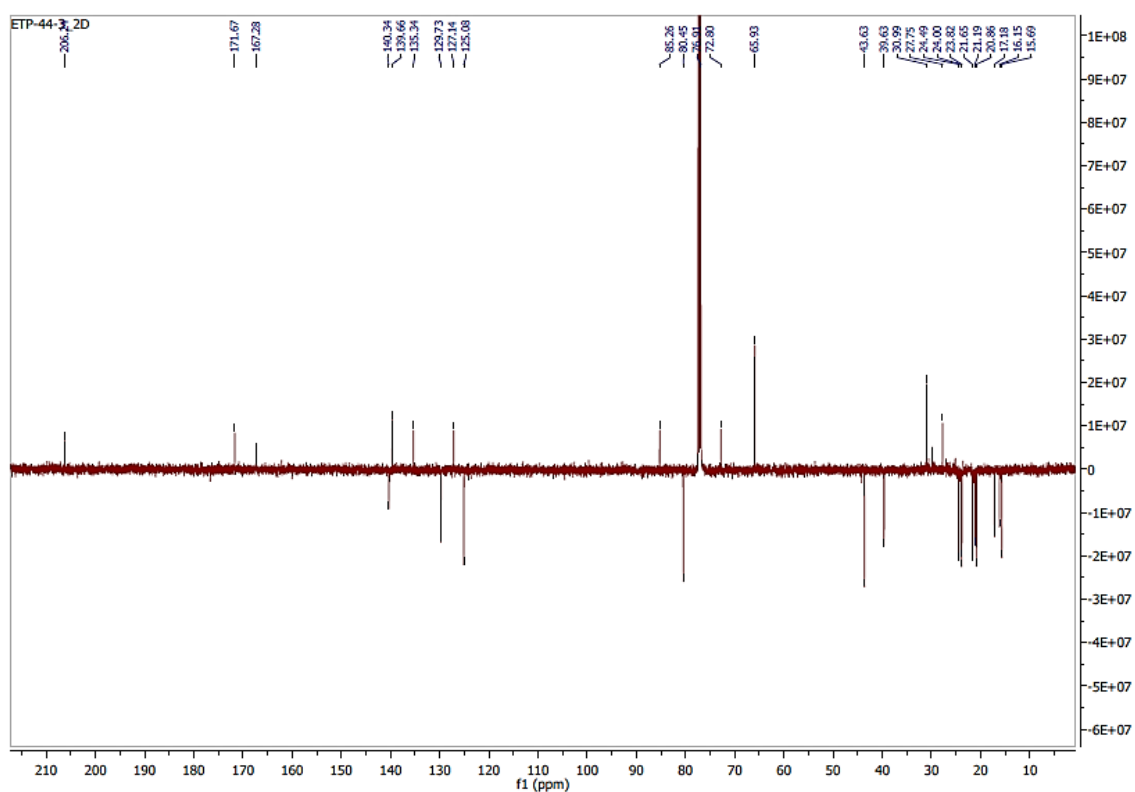

Figure S16.  $^{13}\text{C}$  JMOD NMR spectrum of compound **9** (125 MHz, in  $\text{CDCl}_3$ )

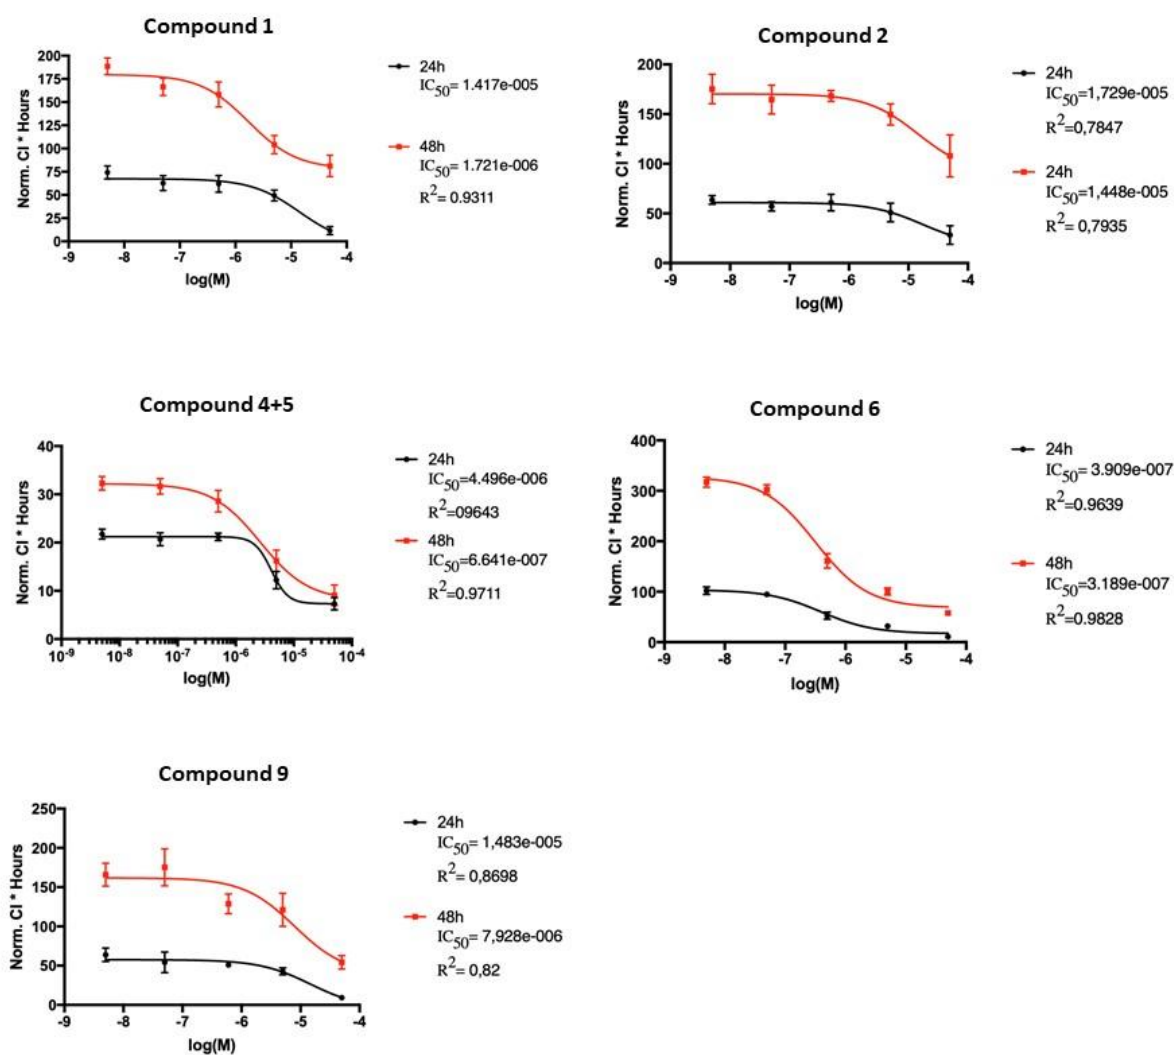

**Figure S17.** RTCA (real-time cell analysis) measurement of CI (cell index) values of HPV-Ker cells treated with compounds 1, 2, 4+5, 6 and 9. Normalized CI \* hours values were plotted as a function of concentration of the indicated diterpenoid (logM).
